# Supplementary material
Source: Elsevier journal article supplement (https://www.sciencedirect.com/science/article/pii/S1853002821000604)
Supplement: mmc1 [file S1853002821000604:mmc1.pdf]

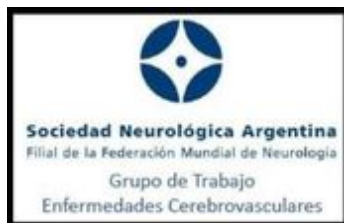

Si trabaja en más de un centro que tenga opciones de tratamiento agudo del ACV, por favor complete una encuesta por cada centro. Si ningún centro en los que trabaja tiene posibilidad de brindar tratamiento agudo del ACV, complete únicamente con información del centro en donde se desempeña principalmente.

## Atención del ACV en Argentina

Los/as invitamos a participar de esta encuesta nacional sobre la atención del ACV en nuestro país, con el objetivo de conocer el estado de situación y mejorar nuestro trabajo.

**Especialidad \***

**Email (en caso de que quiera ser contactado/a)**

ejemplo@ejemplo.com

**Centro en el cual desempeña su actividad \***

**Ciudad \***

**Provincia \***

**¿Cuál es la característica que mejor describe su centro? \***

Hospital público

Centro privado

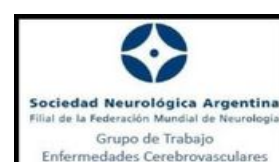

**¿Recibe en su centro pacientes con ACV isquémico agudo? \***

**¿Tiene posibilidad de realizar neuroimagen de urgencia para decidir tratamiento?(marque todas las que tenga disponible) \***

Tomografía computada  
Angio-tomografía con contraste  
Resonancia magnética  
Angio-resonancia  
Angiografía digital

**¿Cuenta con la posibilidad de realizar trombolisis sistémica (Alteplase)? \***

Sí

No

No sabe

**De ser negativo, ¿cuál considera la/s principal/es limitantes? (marque todas las que considere)**

Falta de medicación  
Falta de personal entrenado  
Falta de personal asignado a dicha tarea  
Falta de protocolos estandarizados  
Falta de recursos tecnológicos  
Falta de apoyo institucional  
Falta de políticas públicas de ACV (ley de ACV, PMO, etc.)

**¿Cuenta con la posibilidad de realizar trombectomía mecánica / tromboaspiración? \***

Sí

No

No sabe

**De ser negativo, ¿cuál considera la/s principal/es limitantes? (marque todas las que considere)**

Falta de insumos adecuados

Falta de personal entrenado  
Falta de persona asignado a dicha tarea  
Falta de protocolos estandarizados  
Falta de recursos tecnológicos  
Falta de apoyo institucional  
Falta de políticas públicas de ACV (ley de ACV, PMO, etc.)

**¿Cuenta con la posibilidad de realizar neurocirugía de urgencia? \***

Sí  
  
No  
  
No sabe

**De ser negativo, ¿cuál considera la/s principal/es limitantes? (marque todas las que considere)**

Falta de insumos adecuados  
Falta de personal entrenado  
Falta de personal asignado a dicha tarea  
Falta de protocolos estandarizados  
Falta de recursos tecnológicos  
Falta de apoyo institucional  
Falta de políticas públicas de ACV (ley de ACV, PMO, etc.)

**¿Cuenta con recurso humano disponible para ofrecer tratamiento de reperusión del ACV isquémico agudo? (Marcar todas las opciones disponibles) \***

Neurología  
Neurocirugía  
Terapista endovascular / Neuro-radiología  
Emergentología  
Terapia Intensiva  
Cardiología  
Clínica Médica  
Enfermería  
Kinesiología

**En caso de no poder administrar todas las opciones de tratamiento agudo para el ACV, ¿cuenta con algún plan de derivación para el paciente? \***

Derivación a otro centro para trombolisis y/o trombectomía (a determinar en el momento)

Derivación a otro centro para trombolisis y/o trombectomía (con protocolo pre-establecido)

Trombolisis sistémica en el sitio con posterior derivación para trombectomía mecánica (con protocolo pre-establecido)

No cuenta con posibilidad de derivación para un paciente con ACV agudo

**¿Conoce su tasa anual de trombolisis y/o trombectomía mecánica? \***

Sí

No

**En caso afirmativo, por favor colocar su tasa anual de trombolisis y/o trombectomía mecánica. En caso negativo, colocar "NO".**

**¿Utiliza la telemedicina para alguna etapa del estudio o tratamiento del ACV? \***

Hiperagudo (menos de 6 horas)

Agudo (de 6 a 24 horas)

Post-agudo (posterior a las 24 horas de la internación)

No se dispone de este recurso

**¿Cuenta en su centro con protocolos escritos para el manejo del ACV agudo? \***

Sí

No

No sabe

**En caso de no disponer de trombolisis con alteplase IV o trombectomía mecánica endovascular en su centro ¿estaría interesado en tener un contacto con integrantes del grupo de trabajo de**

**enfermedades cerebrovasculares para implementar estos tratamientos en su centro?**

Sí

No

**¿Estaría interesado en certificar de forma académica su centro como un "Centro listo para tratar el ACV?"**

Sí

No

No sabe
